# Supplementary material for: The cooperation of Fe3C nanoparticles with isolated single iron atoms to boost the oxygen reduction reaction for Zn–air batteries
Source: Royal Society of Chemistry journal article supplement (doi:10.1039/d1ta00039j), 2021-01-01
Supplement: d1ta00039j1.pdf [file d1ta00039j1.pdf]

## Supporting Information

### **The Cooperation of Fe<sub>3</sub>C Nanoparticles with Isolated Single Iron Atoms to Boost the Oxygen Reduction Reaction for Zn-Air Batteries**

Fangling Zhou,<sup>a,†</sup> Peng Yu,<sup>b,†</sup> Fanfei Sun,<sup>c</sup> Guangying Zhang,<sup>a</sup> Xu Liu,<sup>a</sup> Lei Wang<sup>\*a</sup>

<sup>a</sup> *Key Laboratory of Functional Inorganic Material Chemistry, Ministry of Education of the People's Republic of China, Heilongjiang University, Harbin, 150080, P. R. China*

<sup>b</sup> *Key Laboratory for Photonic and Electronic Bandgap Materials, Ministry of Education, School of Physics and Electronic Engineering, Harbin Normal University, Harbin, 150025, P. R. China*

<sup>c</sup> *Shanghai Synchrotron Radiation Facility, Shanghai Institute of Applied Physics, Chinese Academy of Sciences, Shanghai 201204, China.*

**Corresponding authors.** E-mail: wanglei0525@hlju.edu.cn

<sup>†</sup>Equally contributed to this work.

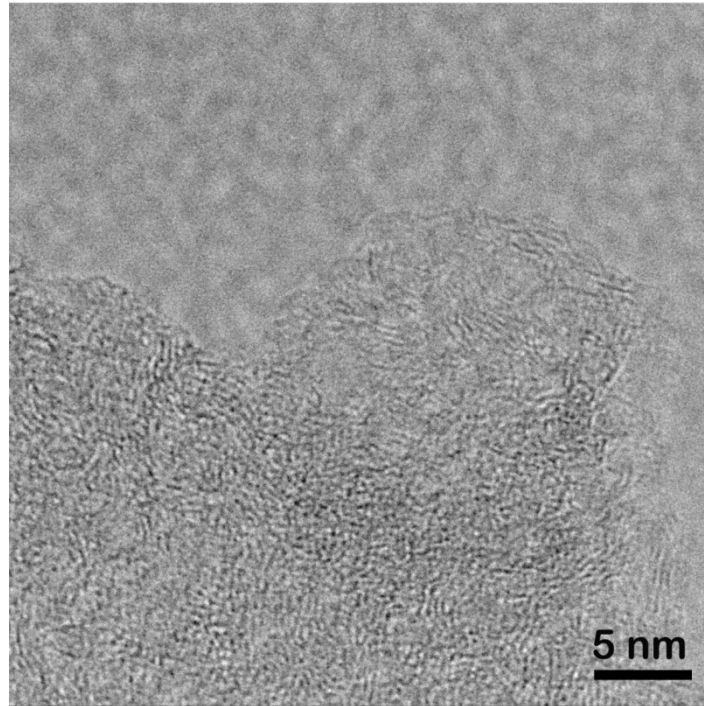

Fig. S1. HRTEM image of Fe<sub>3</sub>C-FeN/NC-2.

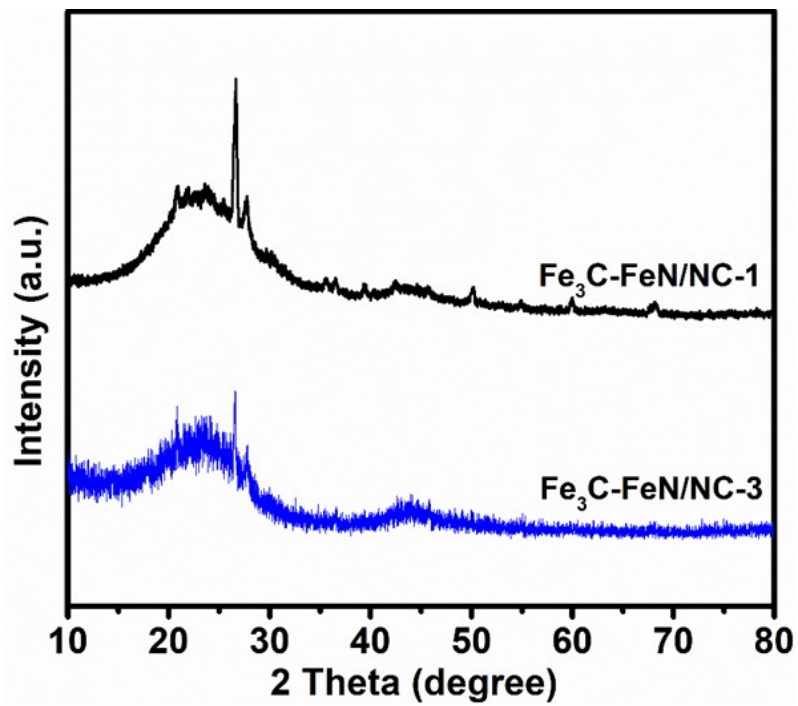

Fig. S2. XRD patterns of Fe<sub>3</sub>C-FeN/NC-1 and Fe<sub>3</sub>C-FeN/NC-3.

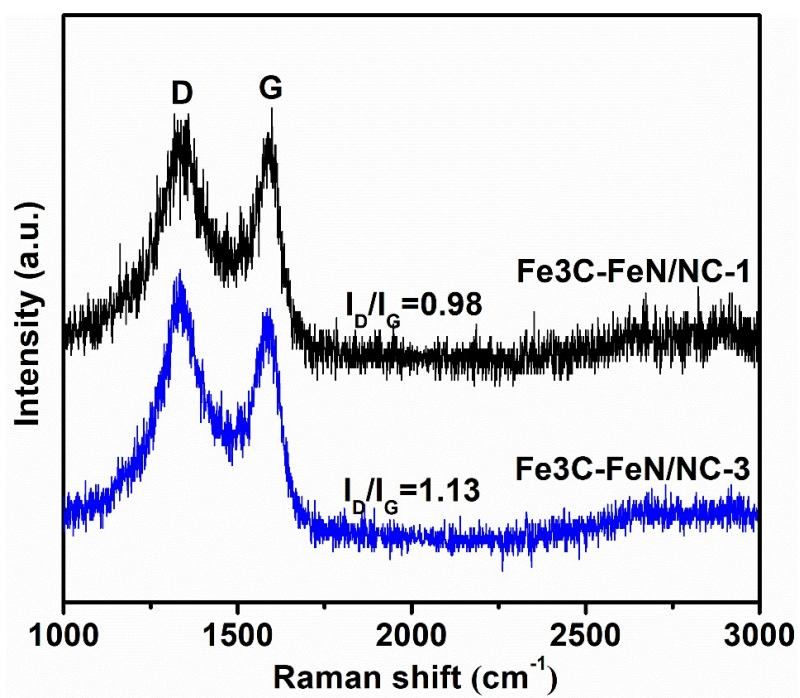

Fig. S3. Raman spectra of Fe<sub>3</sub>C-FeN/NC-1 and Fe<sub>3</sub>C-FeN/NC-3.

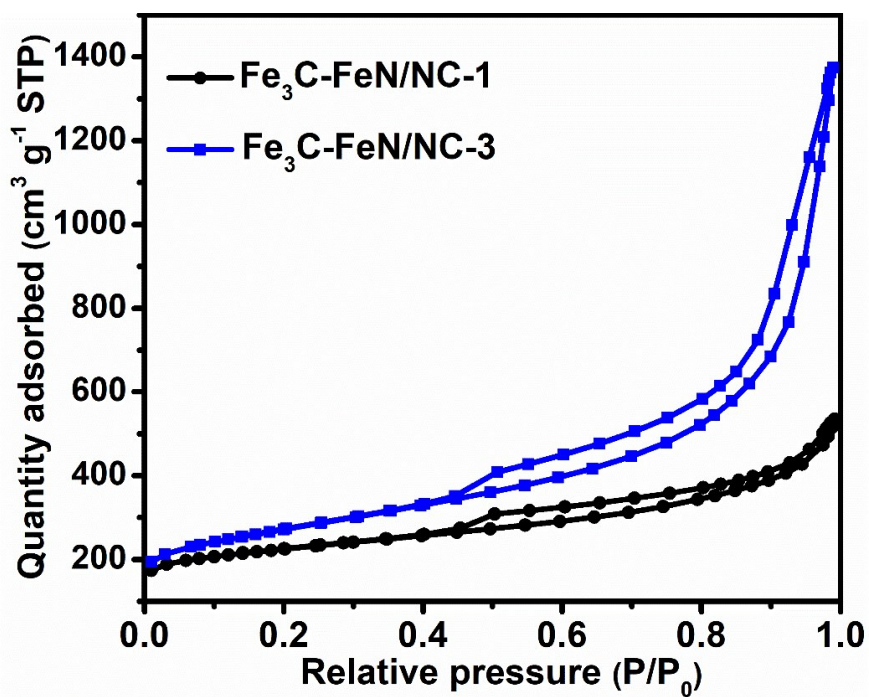

Fig. S4. N<sub>2</sub> adsorption-desorption isotherms of Fe<sub>3</sub>C-FeN/NC-1 and Fe<sub>3</sub>C-FeN/NC-3.

Table S1. The comparison of BET specific surface area for all compared samples.

| Samples                    | BET Surface Area (m <sup>2</sup> g <sup>-1</sup> ) |
|----------------------------|----------------------------------------------------|
| Fe <sub>3</sub> C-FeN/NC-1 | 781.8                                              |
| Fe <sub>3</sub> C-FeN/NC-2 | 853.1                                              |
| Fe <sub>3</sub> C-FeN/NC-3 | 954.3                                              |
| Fe <sub>3</sub> C/NC       | 344.4                                              |
| NC                         | 69.0                                               |

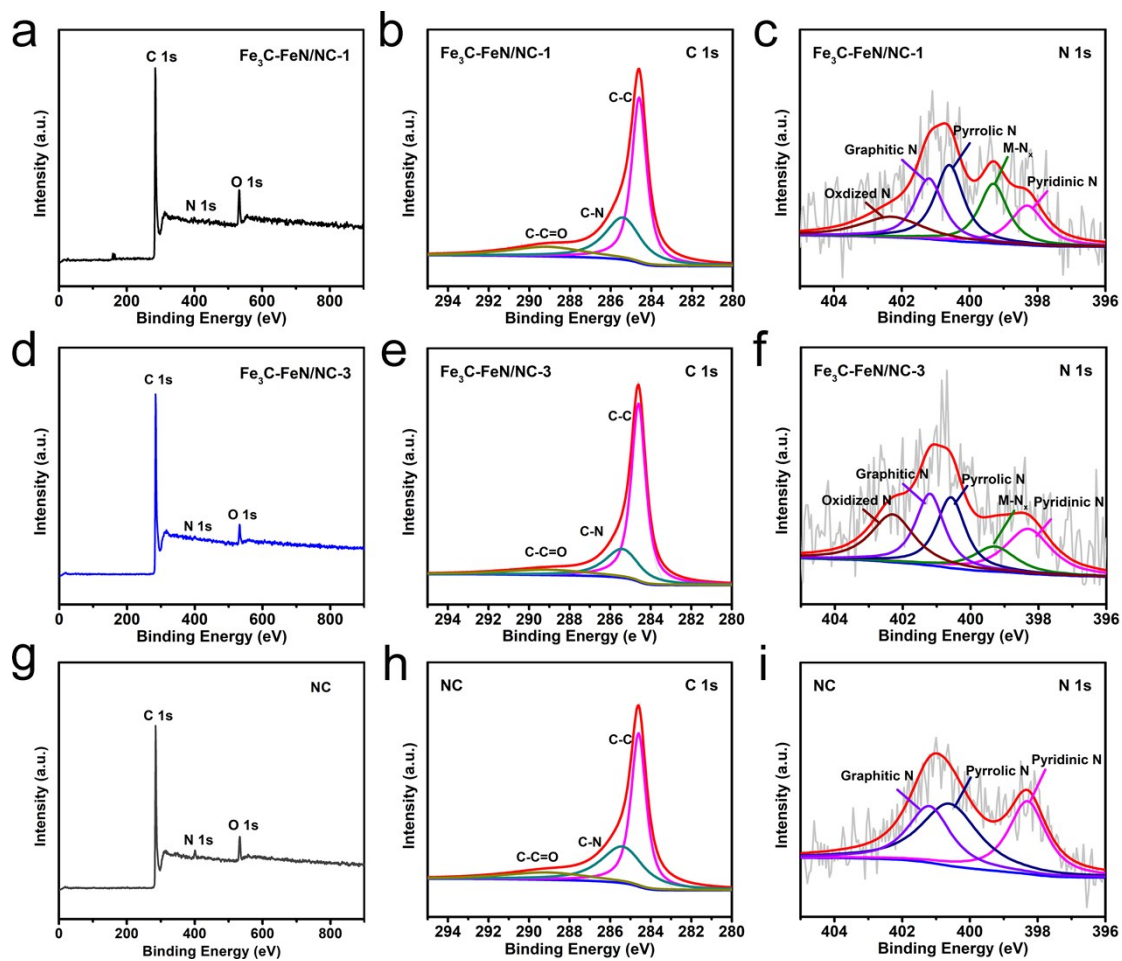

**Fig. S5.** a) Wide-scan, b) C 1s and c) N 1s XPS spectra of Fe<sub>3</sub>C-FeN/NC-1. d) Wide-scan, e) C 1s and f) N 1s XPS spectra of Fe<sub>3</sub>C-FeN/NC-3. g) Wide-scan, h) C 1s and i) N 1s XPS spectra of NC.

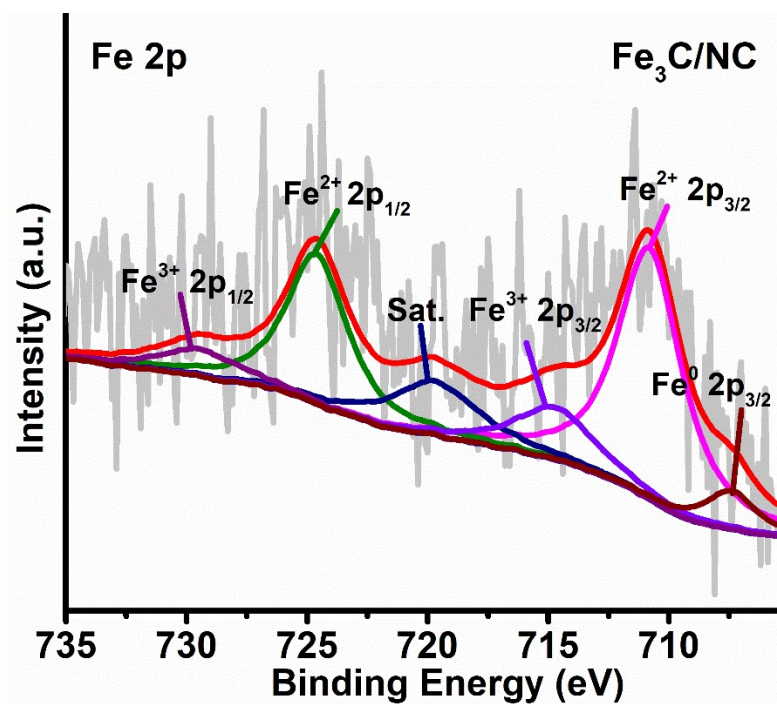

Fig. S6. Fe 2p XPS spectrum of Fe<sub>3</sub>C/NC.

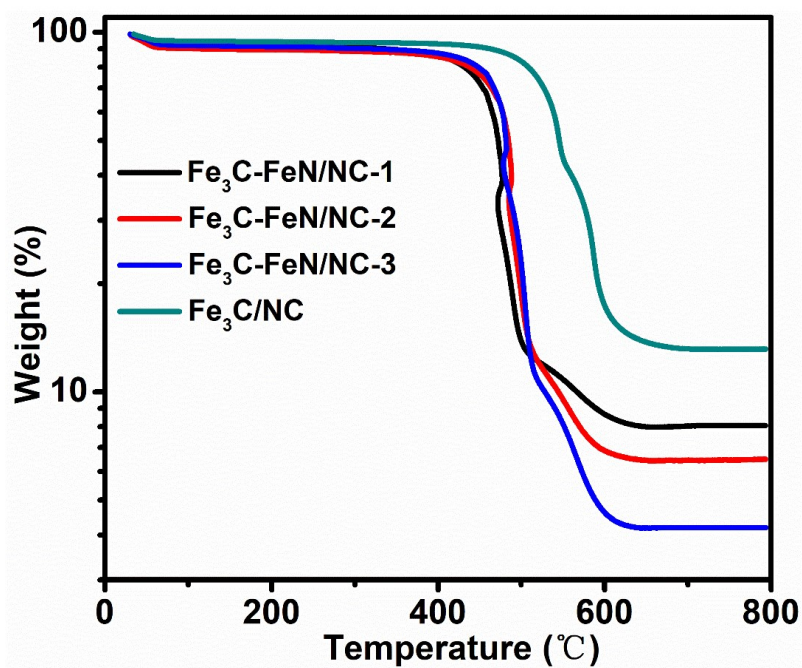

Fig. S7. Thermogravimetric curves of Fe<sub>3</sub>C-FeN/NC-1, Fe<sub>3</sub>C-FeN/NC-2, Fe<sub>3</sub>C-FeN/NC-3 and Fe<sub>3</sub>C/NC at air ambient.

**Table S2.** Fe contents for all compared samples calculated based on the TG analyses in Fig. S7.

| sample                     | Final residual mass<br>after TG tests<br>Fe <sub>2</sub> O <sub>3</sub> (wt. %) | Fe content<br>calculated based on<br>Fe <sub>2</sub> O <sub>3</sub> (wt. %) |
|----------------------------|---------------------------------------------------------------------------------|-----------------------------------------------------------------------------|
| Fe <sub>3</sub> C-FeN/NC-1 | 8.0                                                                             | 5.6                                                                         |
| Fe <sub>3</sub> C-FeN/NC-2 | 6.5                                                                             | 4.5                                                                         |
| Fe <sub>3</sub> C-FeN/NC-3 | 4.2                                                                             | 2.9                                                                         |
| Fe <sub>3</sub> C/NC       | 13.2                                                                            | 9.2                                                                         |

**Table S3.** EXAFS fitted results for Fe<sub>3</sub>C-FeN/NC and Fe<sub>3</sub>C/NC samples.

| Sample                     | shell | N <sup>[a]</sup> | R (Å) <sup>[b]</sup> | σ <sup>2</sup> (10 <sup>-3</sup> ) <sup>[c]</sup> | E <sub>0</sub> (eV) <sup>[d]</sup> | R factor |
|----------------------------|-------|------------------|----------------------|---------------------------------------------------|------------------------------------|----------|
| Fe <sub>3</sub> C-FeN/NC-1 | Fe-N  | 3.56 ± 0.2       | 1.97 ± 0.02          | 11.6                                              | -6.9                               | 0.002    |
|                            | Fe-Fe | 2.96 ± 0.3       | 2.54 ± 0.02          | 8.6                                               | -5.4                               |          |
| Fe <sub>3</sub> C-FeN/NC-2 | Fe-N  | 3.96 ± 0.2       | 1.94 ± 0.02          | 4.5                                               | -4.5                               | 0.003    |
|                            | Fe-Fe | 2.68 ± 0.2       | 2.53 ± 0.02          | 9.8                                               | -5.7                               |          |
| Fe <sub>3</sub> C-FeN/NC-3 | Fe-N  | 4.04 ± 0.2       | 1.99 ± 0.02          | 4.8                                               | -5.7                               | 0.002    |
|                            | Fe-Fe | 1.83 ± 0.2       | 2.52 ± 0.02          | 4.4                                               | -3.8                               |          |
| Fe <sub>3</sub> C/NC       | Fe-N  | 1.02 ± 0.2       | 1.91 ± 0.02          | 1.2                                               | -4.6                               | 0.002    |
|                            | Fe-Fe | 3.6 ± 0.2        | 2.44 ± 0.02          | 9.6                                               | -9.4                               |          |

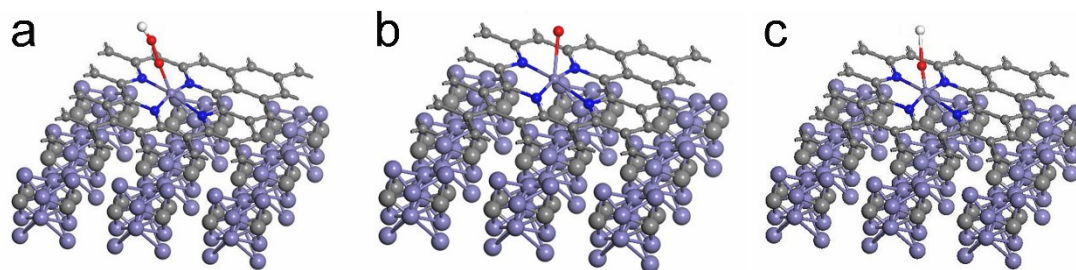

**Fig. S8.** The adsorption configurations for intermediates a) OOH\*, b) O\* and c) OH\* on Fe<sub>3</sub>C/Fe-N<sub>4</sub>.



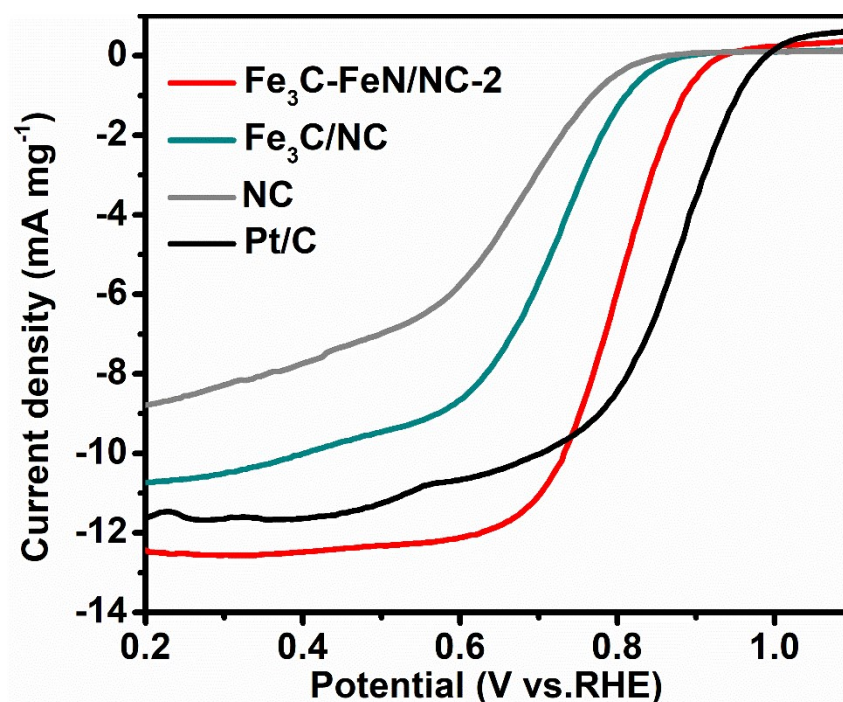

Fig. S9. The mass activity for all the compared catalysts.

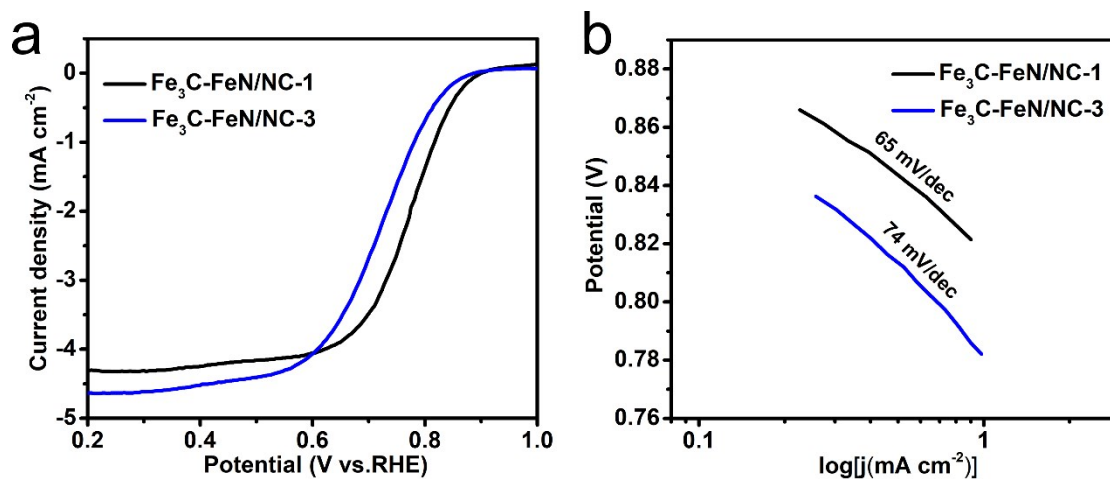

Fig. S10. a) ORR LSV curves and b) Tafel plots of Fe<sub>3</sub>C-FeN/NC-1, Fe<sub>3</sub>C-FeN/NC-3 tested in O<sub>2</sub>-saturated 0.1 M KOH electrolyte.

**Table S4.** The comparison of ORR performance of Fe<sub>3</sub>C-FeN/NC-2 with recently reported Pt-free catalysts tested in 0.1 M KOH electrolyte.

| Catalyst                                      | $E_{\text{onset}}$<br>(V vs. RHE) | $E_{1/2}$<br>(V vs. RHE) | Tafel slope<br>(mV dec <sup>-1</sup> ) | Reference        |
|-----------------------------------------------|-----------------------------------|--------------------------|----------------------------------------|------------------|
| P,S-Co <sub>x</sub> O <sub>y</sub> /Cu@CuS NW | 0.89                              | 0.67                     | 80.8                                   | S1               |
| NiCo <sub>2.148</sub> O <sub>4</sub> PNSs     | 0.85                              | 0.65                     | -                                      | S2               |
| NiFe@N-CFs                                    | 0.94                              | 0.82                     | 58                                     | S3               |
| MnO/Co/PGC                                    | 0.95                              | 0.78                     | 69                                     | S4               |
| FeS/Fe <sub>3</sub> C@NS-C-900                | 1.03                              | 0.78                     | 94                                     | S5               |
| Fe <sub>0.5</sub> Ni <sub>0.5</sub> @N-GR     | 0.94                              | 0.83                     | -                                      | S6               |
| HNG-900                                       | 0.95                              | -                        | 72                                     | S7               |
| Co <sub>2</sub> P@CNF                         | 0.915                             | 0.803                    | 77.1                                   | S8               |
| CoP@PNC-DoS                                   | 0.94                              | 0.803                    | 85.6                                   | S9               |
| Bi-CoP/NP-DG                                  | 0.93                              | 0.81                     | -                                      | S10              |
| CoP-PBSCF                                     | -                                 | 0.752                    | 85.7                                   | S11              |
| NVG-30                                        | 0.91                              | 0.80                     | 51.1                                   | S12              |
| <b>Fe<sub>3</sub>C-FeN/NC-2</b>               | <b>0.95</b>                       | <b>0.80</b>              | <b>55</b>                              | <b>This work</b> |

#### References:

- S1. T. L. L. Doan, D. T. Tran, D. C. Nguyen, D. H. Kim, N. H. Kim and J. H. Lee, *Adv. Funct. Mater.*, DOI:10.1002/admf.202007822.
- S2. J. Yin, J. Jin, H. Liu, B. Huang, M. Lu, J. Li, H. Liu, H. Zhang, Y. Peng, P. Xi and C. H. Yan, *Adv. Mater.*, 2020, **32**, 2001651.
- S3. Y. Niu, X. Teng, S. Gong and Z. Chen, *J. Mater. Chem. A*, 2020, **8**, 13725-13734.
- S4. X. F. Lu, Y. Chen, S. Wang, S. Gao and X. W. D. Lou, *Adv. Mater.*, 2019, **31**, 1902339.
- S5. Y. W. Li, W. J. Zhang, J. Li, H. Y. Ma, H. M. Du, D. C. Li, S. N. Wang, J. S. Zhao, J. M. Dou and L. Xu, *ACS Appl. Mater. Interfaces*, 2020, **12**, 44710-44719.

- S6. P. Liu, D. Gao, W. Xiao, L. Ma, K. Sun, P. Xi, D. Xue and J. Wang, *Adv. Funct. Mater.*, 2018, **28**, 1706928.
- S7. H. Cui, M. Jiao, Y.-N. Chen, Y. Guo, L. Yang, Z. Xie, Z. Zhou and S. Guo, *Small Methods*, 2018, **2**, 1800144.
- S8. J. Gao, J. Wang, L. Zhou, X. Cai, D. Zhan, M. Hou and L. Lai, *ACS Appl. Mater. Interfaces*, 2019, **11**, 10364-10372.
- S9. Y. Li, Y. Liu, Q. Qian, G. Wang and G. Zhang, *Energy Stor. Mater.*, 2020, **28**, 27-36.
- S10 J. Chen, B. Ni, J. Hu, Z. Wu and W. Jin, *J. Mater. Chem. A*, 2019, **7**, 22507-22513.
- S11. Y.-Q. Zhang, H.-B. Tao, Z. Chen, M. Li, Y.-F. Sun, B. Hua and J.-L. Luo, *J. Mater. Chem. A*, 2019, **7**, 26607-26617.
- S12. Z. Wu, Y. Zhang, L. Li, Y. Zhao, Y. Shen, S. Wang and G. Shao, *J. Mater. Chem. A*, 2020, **8**, 23248-23256.

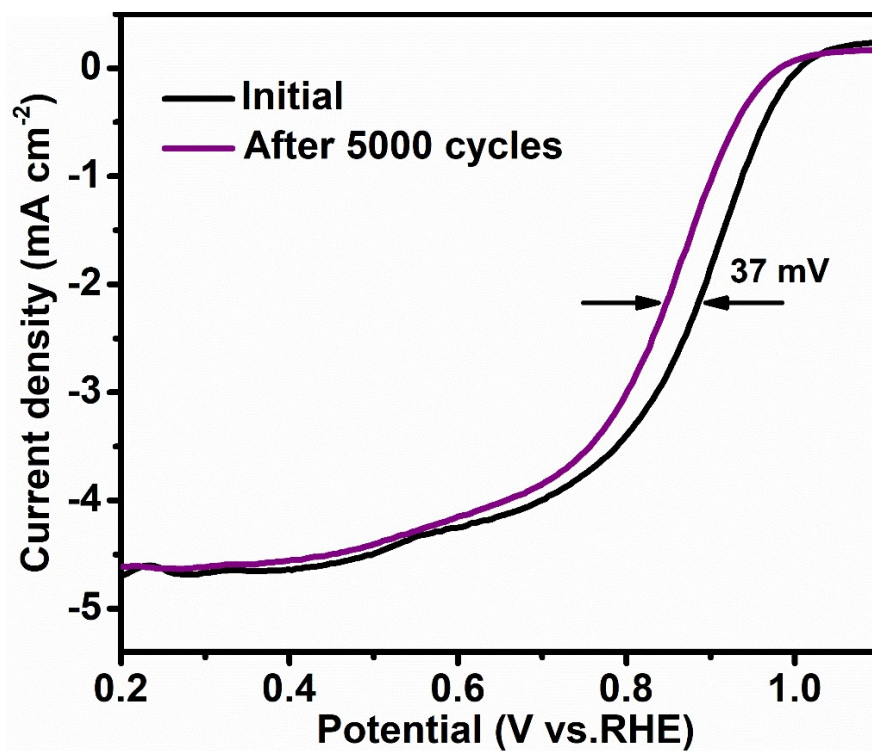

Fig. S11. Stability test of the Pt/C catalyst after 5000 cycles.

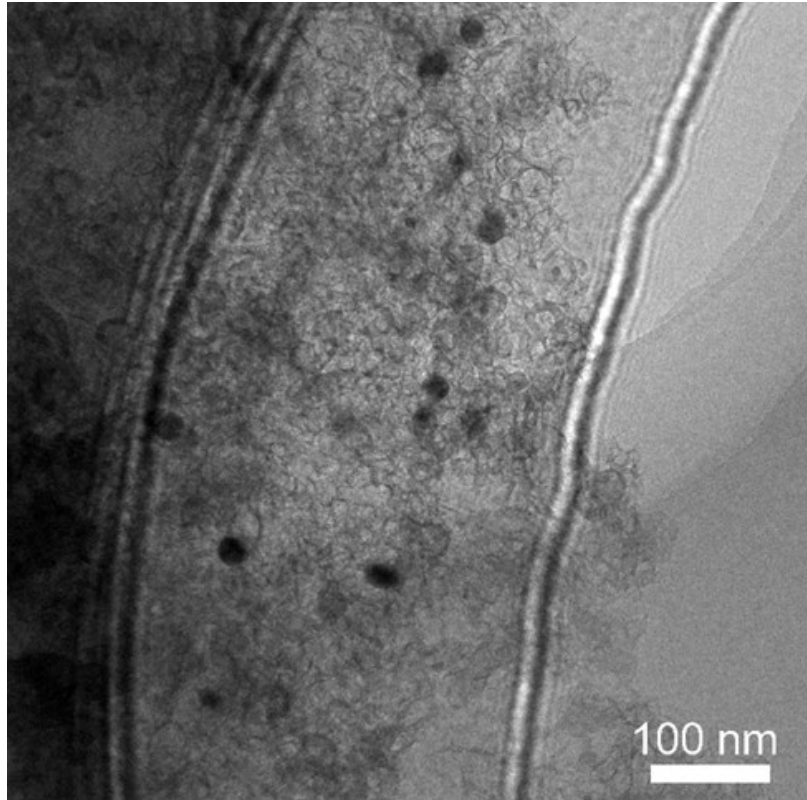

**Fig. S12.** TEM image of Fe<sub>3</sub>C-FeN/NC-2 after ORR test.

**Density Functional Theory Calculations:** All the theoretical computations were performed by CASTEP code (implemented in Material Studio). The generalized gradient approximation (GGA) with a Perdew–Burke–Ernzerhof (PBE) functional was used to describe the electronic exchange and correlation effects, and the plane-wave cutoff was tested and set to 340 eV. The selfconsistent field (SCF) tolerance was  $1 \times 10^{-5}$  eV. The Brillouin zone was sampled at a  $(1 \times 1 \times 1)$  mesh. Fe<sub>3</sub>C (211) and Fe-N<sub>4</sub>-graphene (002) surface models were built based on the TEM and XRD results of the Fe<sub>3</sub>C-FeN/NC catalysts.

The Gibbs free energy (G) was calculated as  $G = E_{\text{surf}} + E_{\text{ZPE}} - T \Delta S$ , where  $E_{\text{surf}}$  is the total energy calculated via DFT, and  $E_{\text{ZPE}}$  is the zero-point energy calculated using the vibrational frequencies of the adsorbates

The adsorption energy ( $E_{\text{ads}}$ ) is defined as the following equation:

$$E_{\text{ads}} = E_{\text{surf}+\text{O}_2} - E_{\text{surf}} - E_{\text{O}_2}$$

Therein,  $E_{\text{surf}+\text{O}_2}$  is the total energy of the O<sub>2</sub>/material system,  $E_{\text{surf}}$  is the material surface and  $E_{\text{O}_2}$  is the free O<sub>2</sub> molecule.

**Table S5.** The calculated free energy of Fe-N<sub>4</sub>/Fe<sub>3</sub>C with intermediates.

| sample        | Free energy (eV) |
|---------------|------------------|
| Clean surface | -42571.51        |
| O*            | -43004.97        |
| OH*           | -43023.09        |
| OOH*          | -43456.38        |

The ORR reaction for 4e<sup>-</sup> pathway in alkaline media:

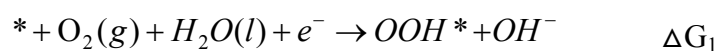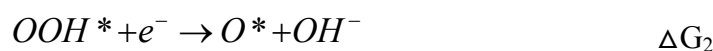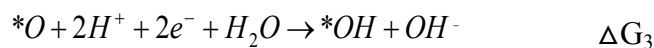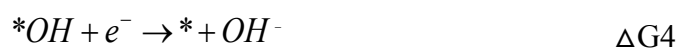

The  $\Delta_{ZPE}$ ,  $\Delta_S$  and DFT-calculated free energy data are listed in **Table S5**. For each ORR reaction step, the Gibbs free energy of the formation can be calculated by  $\Delta E$  is the reaction energy of a given reaction step and can be obtained from DFT calculations,  $\Delta_{ZPE}$  and  $\Delta S$  are the corrected zero point energy and entropy, respectively.  $U$  is the applied potential vs RHE and  $e$  is the charge transferred.

The Gibbs free energy of formation for each reaction step is calculated by the follows:

$$\Delta G = \Delta E_{DFT} + \Delta_{ZPE} - T\Delta S - e U + \Delta G_{pH}$$

Therein, the Zero point energies and entropic corrections ( $\Delta_{ZPE} - T\Delta S$ ) are 0.30, 0.32 and 0.05 for  $\text{OH}^*$ ,  $\text{OOH}^*$ , and  $\text{O}^*$  species at 298 K, respectively.  $\Delta G_{pH}$  is the correction of free energy of  $\text{H}^+$ ,  $\Delta G_{pH} = -k_b T \ln[\text{H}^+] = \text{pH} * k_b T \ln 10$ .
